# Supplementary material
Source: PubMed Central journal article supplement (PMC10534226)

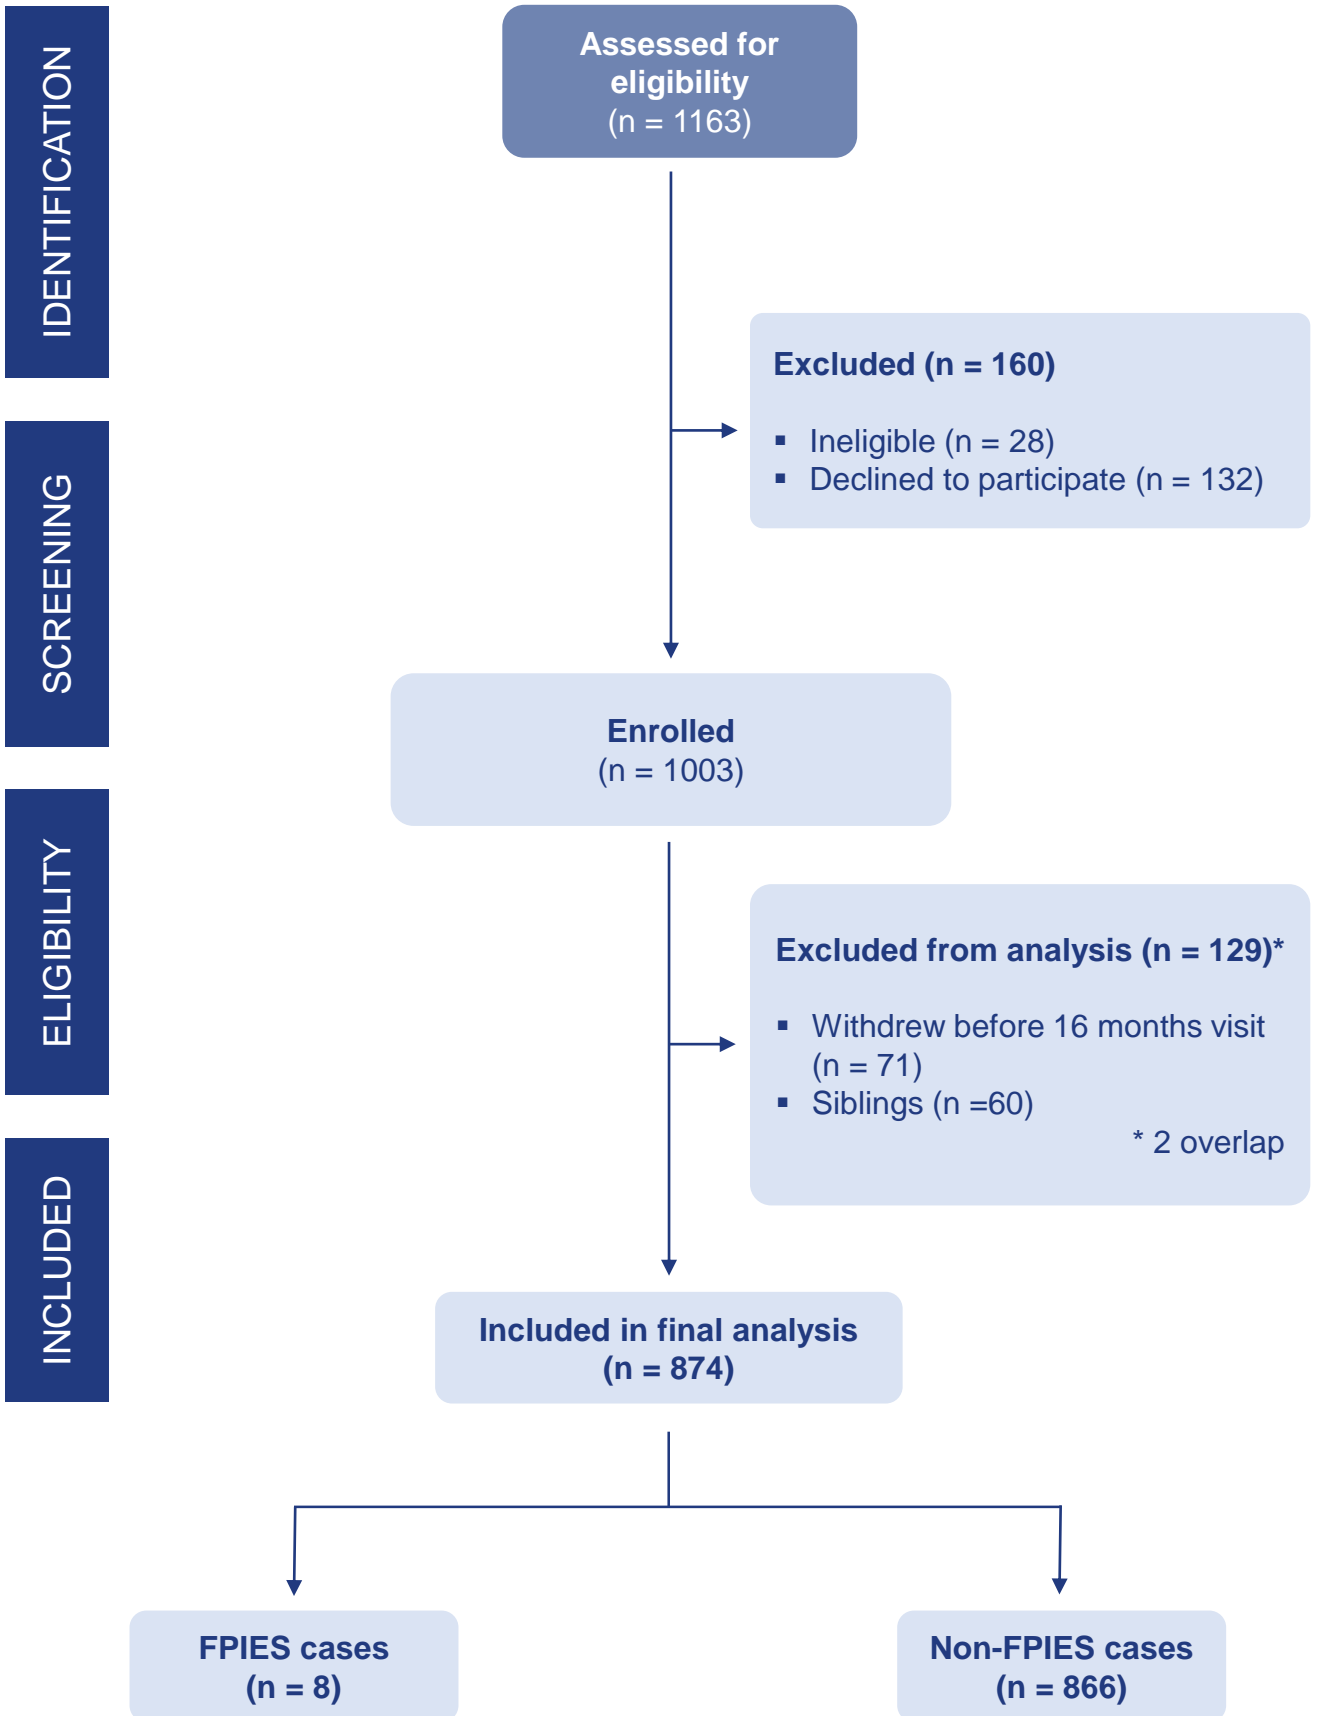

Supplementary Figure 1\_Su et al.

Supplement: NIHMS1924372-supplement-Supplemental_data.pdf [file NIHMS1924372-supplement-Supplemental_data.pdf]
